# Supplementary material for: Porcine brain extract promotes osteogenic differentiation of bone marrow derived mesenchymal stem cells and bone consolidation in a rat distraction osteogenesis model
Source: PubMed Central journal article supplement (PMC5665543; doi:10.1371/journal.pone.0187362), 2017-11-01
Supplement: pone.0187362.s001.pdf [file pone.0187362.s001.pdf]

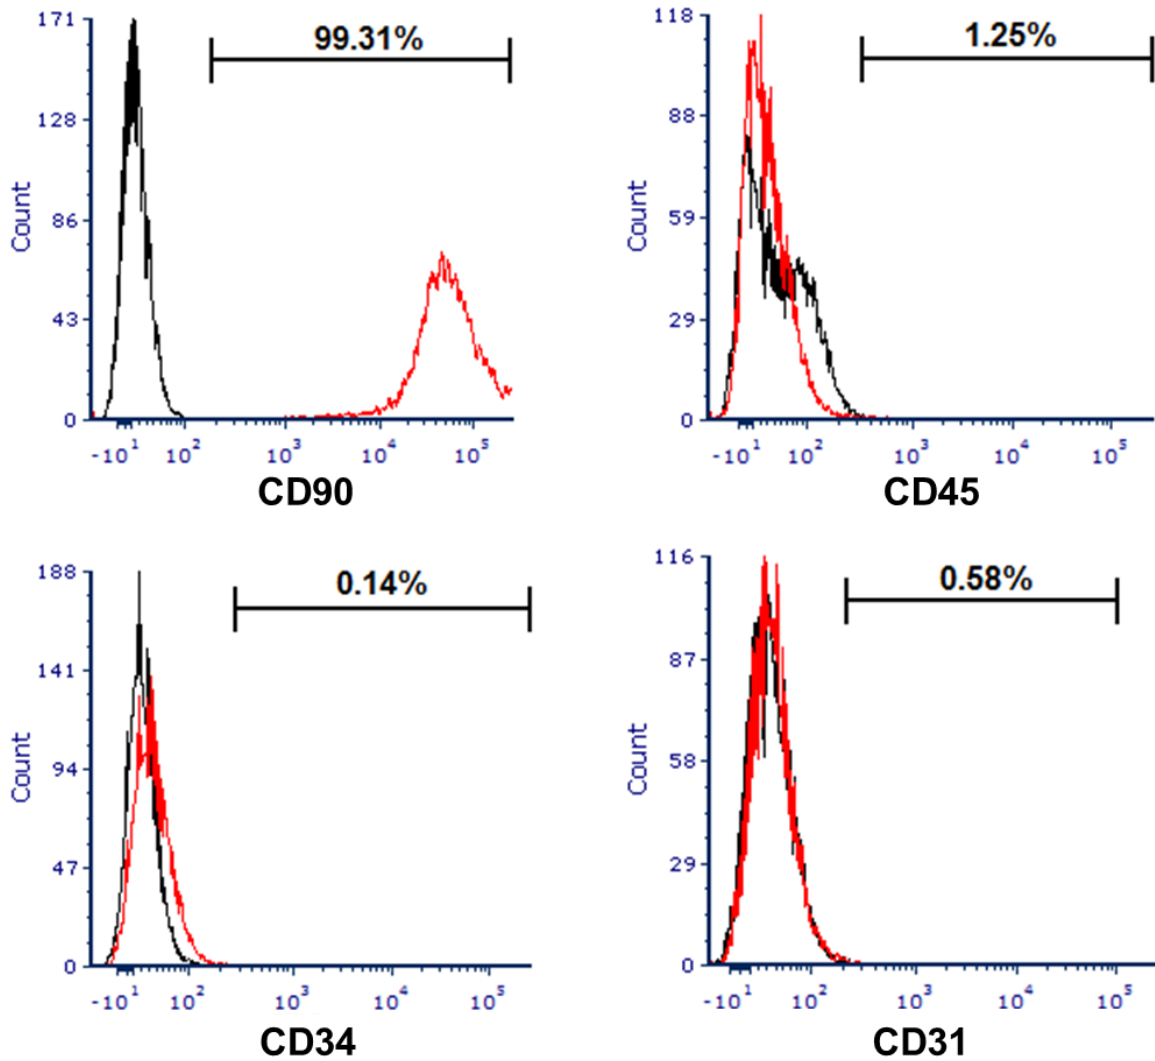

**Supplementary Figure 1.** Cell surface markers of rBMSCs derived from healthy 12-week male rats. Over 97% MSCs expressed the positive markers CD90, and only a few cells (<3%) expressed the negative markers CD45, CD34, and CD31.
